# Supplementary material for: Near infrared light triggered reactive oxygen species responsive nanoparticles for chemo-photodynamic combined therapy
Source: Royal Society of Chemistry journal article supplement (doi:10.1039/c8tb00308d), 2018-01-01

Electronic Supplementary Information

**Near Infrared Light Triggered Reactive Oxygen Species  
Responsive Nanoparticles for Chemo-Photodynamic Combined  
Therapy**

Xuefei Zhang,<sup>‡</sup> Binyao Huang,<sup>‡</sup> Yifeng Shen, Chanzhen Yang, Zeqian Huang, Yanjuan Huang,  
Xiaoyu Xu, Yali Jiang, Xiaoqi Sun, Xining Li, Mina Yan\* and Chunshun Zhao\*

School of Pharmaceutical Sciences, Sun Yat-sen University, 132 Waihuan East Road, Guangzhou  
Higher Education Mega Center, GuangZhou 510006, PR China

Fig. S1 Schematic illustration of the preparation of mTiO<sub>2</sub>-BCBL@ZnPc NPs.

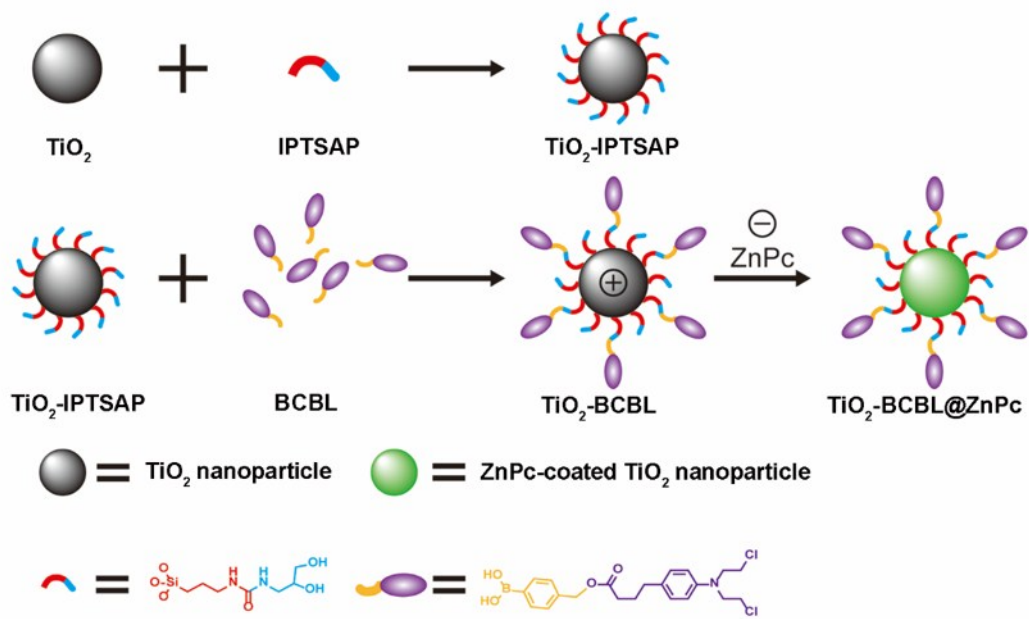

Fig. S2 The  $^1\text{H}$  NMR of IPTSAP. The structure of IPTSAP was confirmed via NMR (400 MHz,  $\text{DMSO-d}_6$ ). There were the following parameters:  $^1\text{H}$  NMR  $\delta$  6.04 (s, 1H), 5.81 (s, 1H), 4.78 (s, 1H), 4.55 (s, 1H), 3.73 (d,  $J = 6.9$  Hz, 6H), 3.44 (dd,  $J = 15.6, 8.5$  Hz, 2H), 3.01 – 2.84 (m, 4H), 1.43 – 1.36 (m, 2H), 1.14 (t,  $J = 6.8$  Hz, 9H), 0.55 – 0.48 (m, 2H).  $^{13}\text{C}$  NMR  $\delta$  158.68, 71.17, 63.49, 57.65.

IPTES-AP-0910\_10.fid

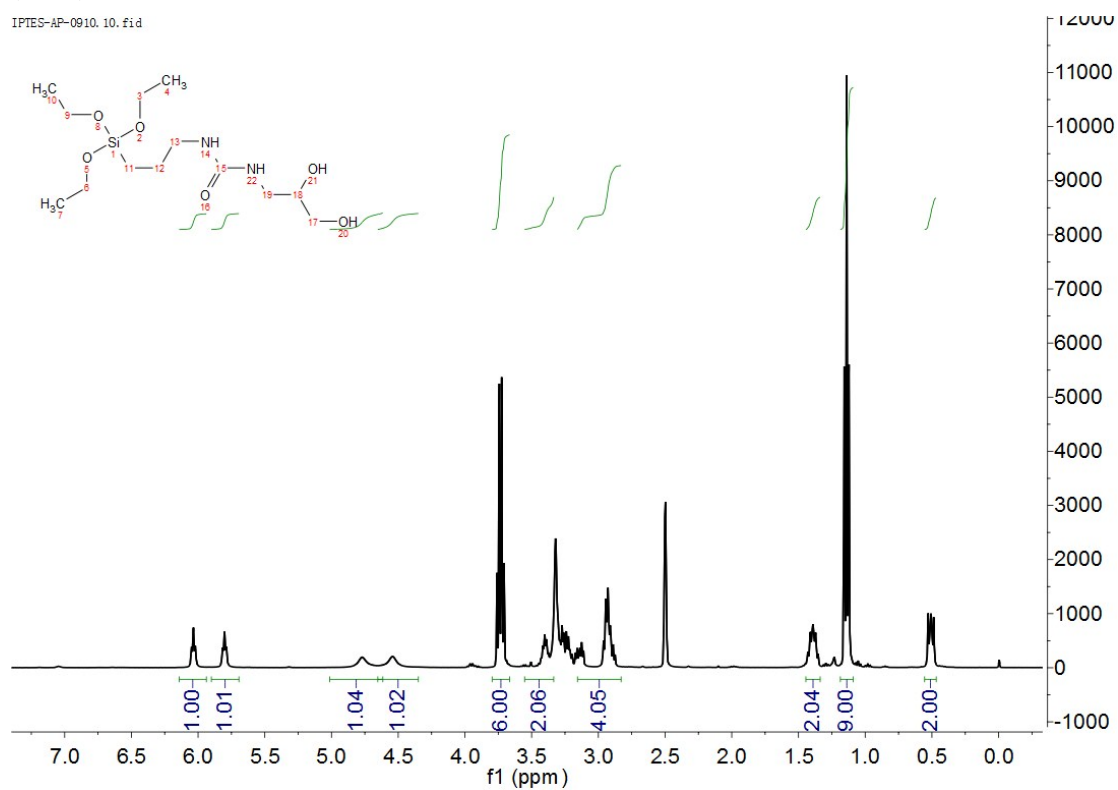

Fig. S3 The  $^{13}\text{C}$  NMR of IPTSAP.

IPTSAP-C13/10

$^{13}\text{C}$  NMR (101 MHz,  $\text{DMSO}-d_6$ )  $\delta$  158.68, 71.17, 63.49, 57.65, 42.66, 42.02, 23.53, 18.15 (d,  $J = 1.9$  Hz), 14.63.

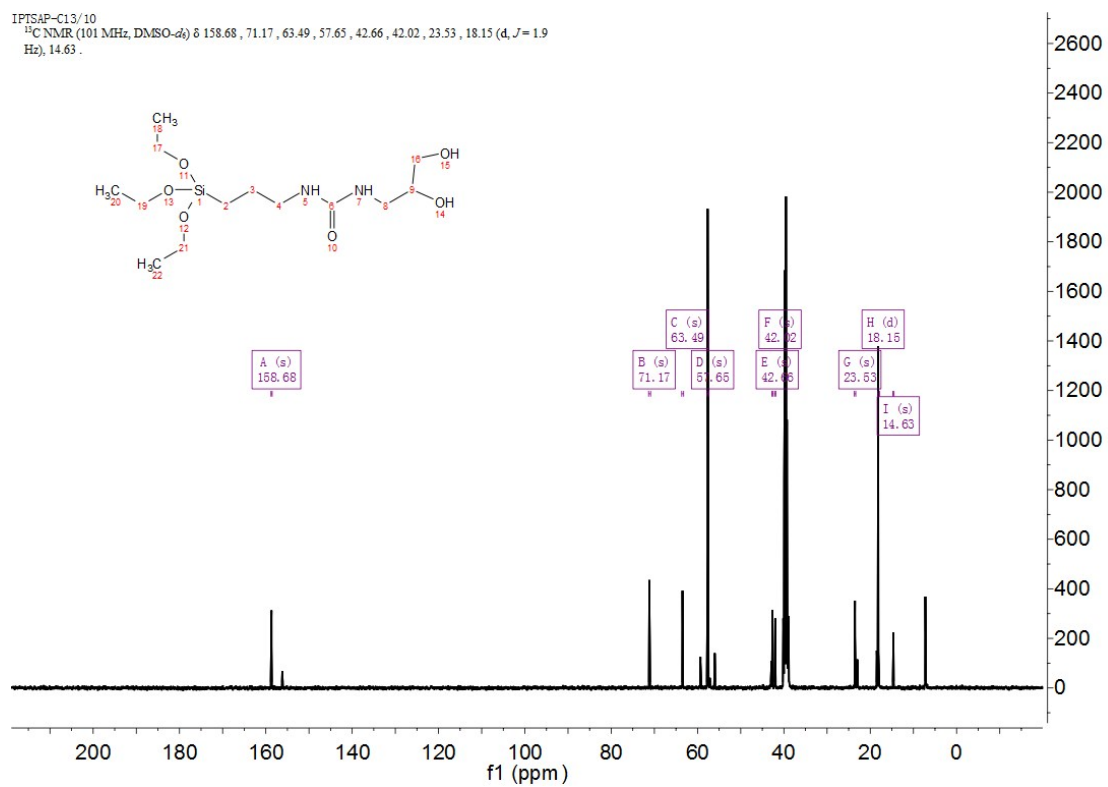

Fig. S4 The  $^1\text{H}$  NMR of compound **1**. The structure of compound **1** was confirmed via NMR (400 MHz, Chloroform-d). There were the following parameters:  $^1\text{H}$  NMR  $\delta$  7.22 (d, 2H), 7.05 (d, 2H), 6.85 (d, 2H), 6.62 (d, 2H), 5.17 (s, 2H), 3.73 – 3.58 (m, 8H), 2.53 (t, 2H), 2.40 (t, 2H), 1.95 (m, 2H).  $^{13}\text{C}$  NMR  $\delta$  173.49, 144.44, 139.43, 135.21, 130.61, 129.83, 127.46, 112.26, 66.20, 53.73, 40.65, 34.05, 33.73, 26.86.

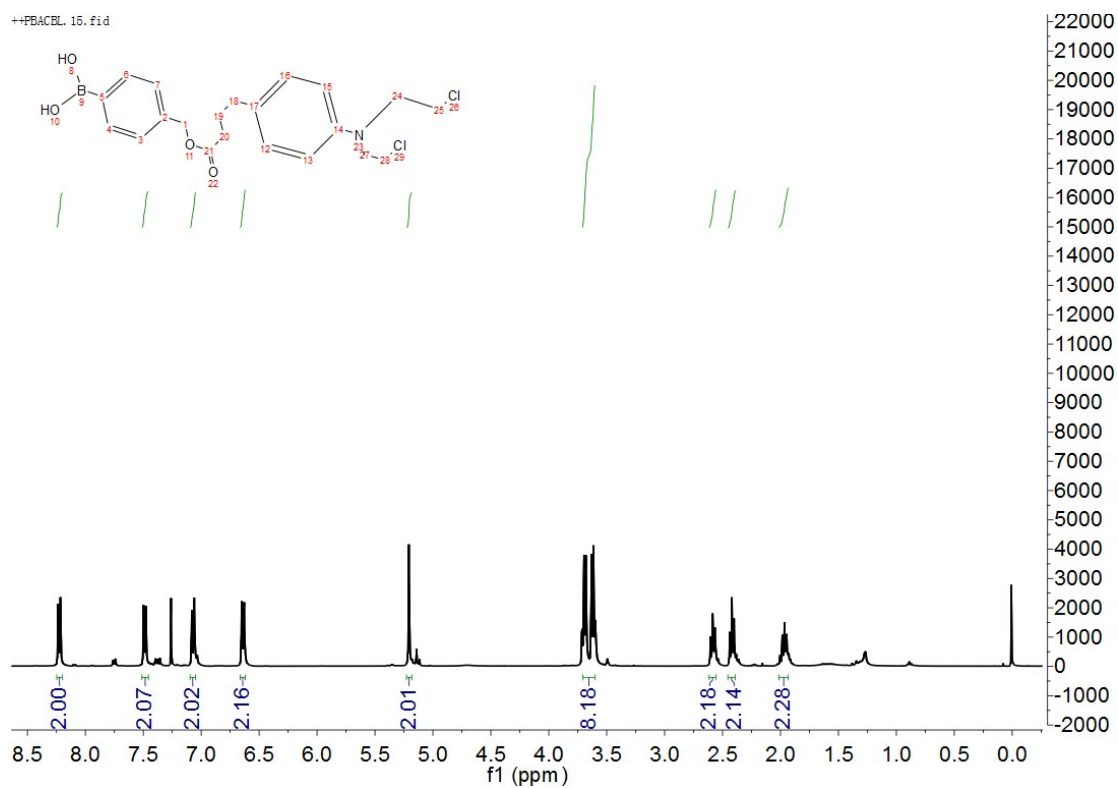

Fig. S5 The  $^{13}\text{C}$  NMR of compound 1.

PMACBL-3-CDC13-C13.15.fid

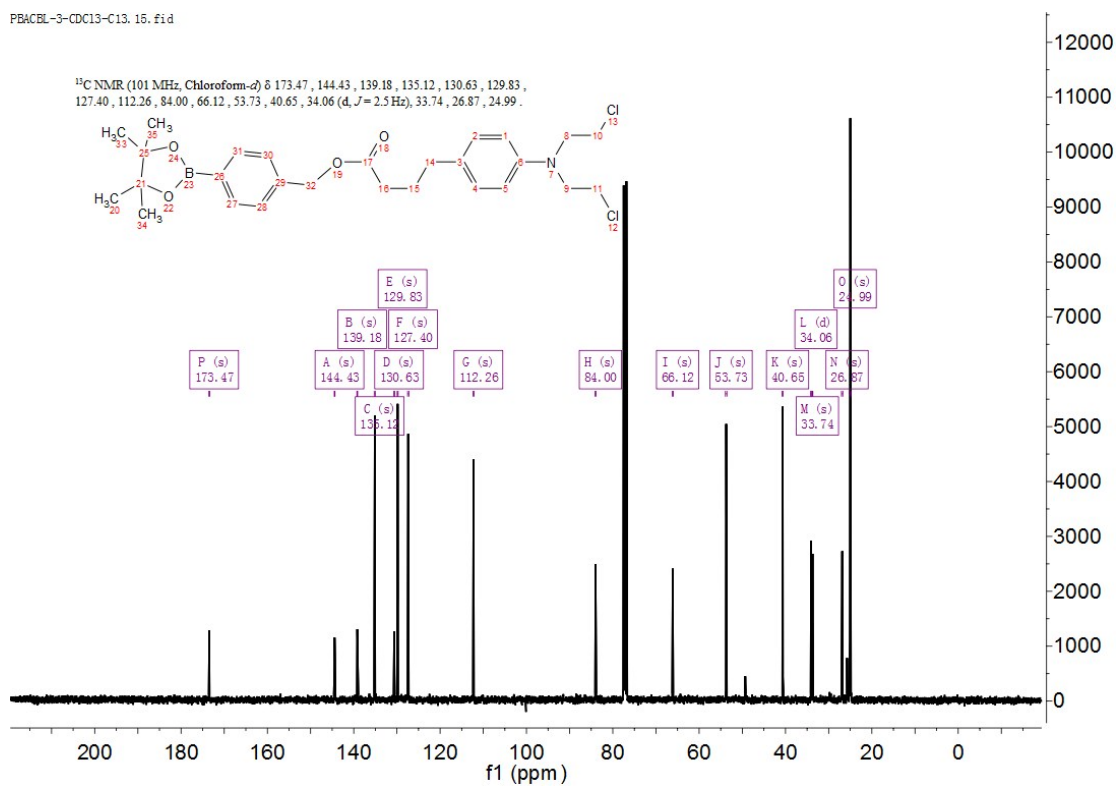

Fig. S6 The characterization of sulfonation zinc phthalocyanine (ZnPc).

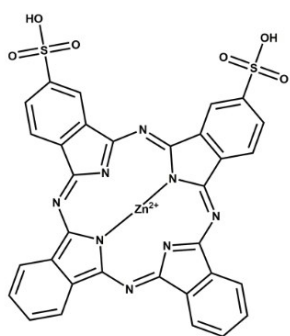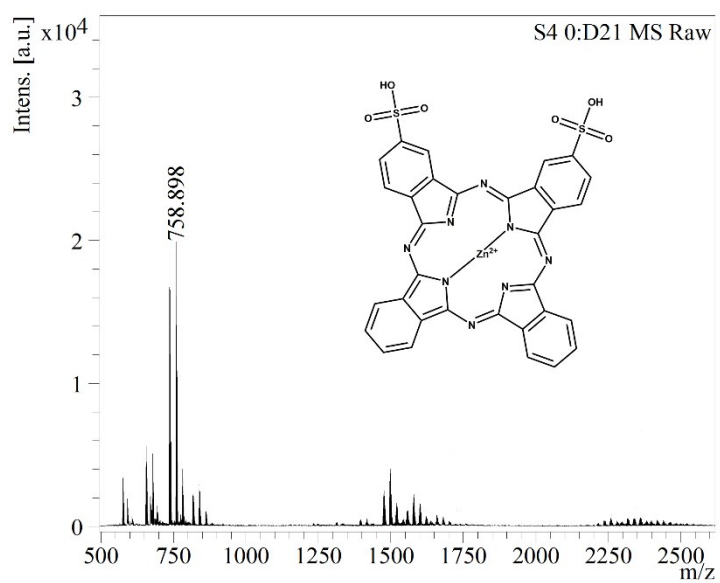

Fig. S7 The stability of mTiO<sub>2</sub>-BCBL@ZnPc NPs for different dilution ratios and storage time.

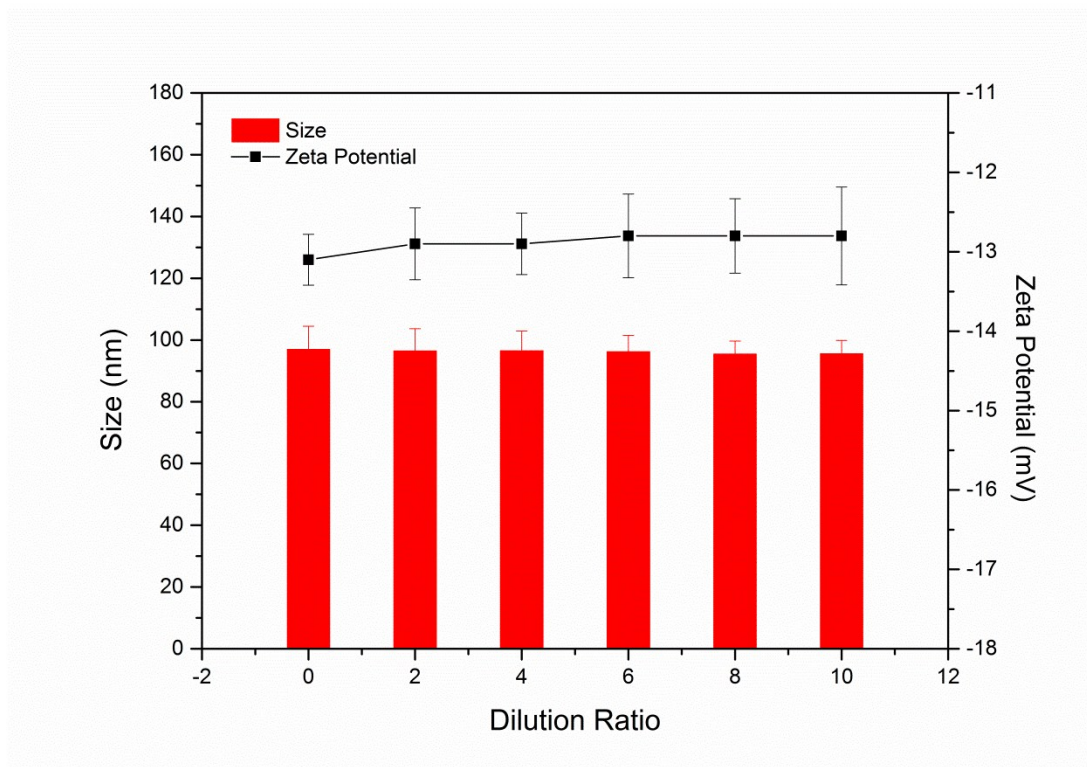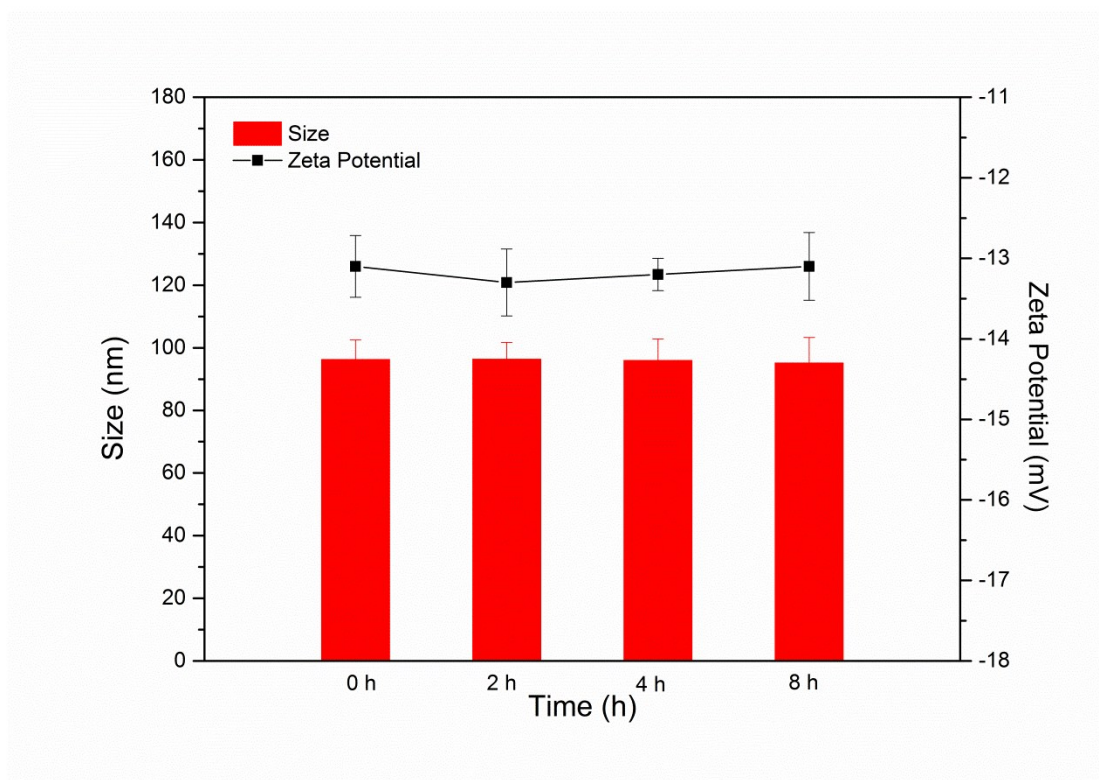



Fig. S8 Determination of H<sub>2</sub>O<sub>2</sub> in dark condition for 20min

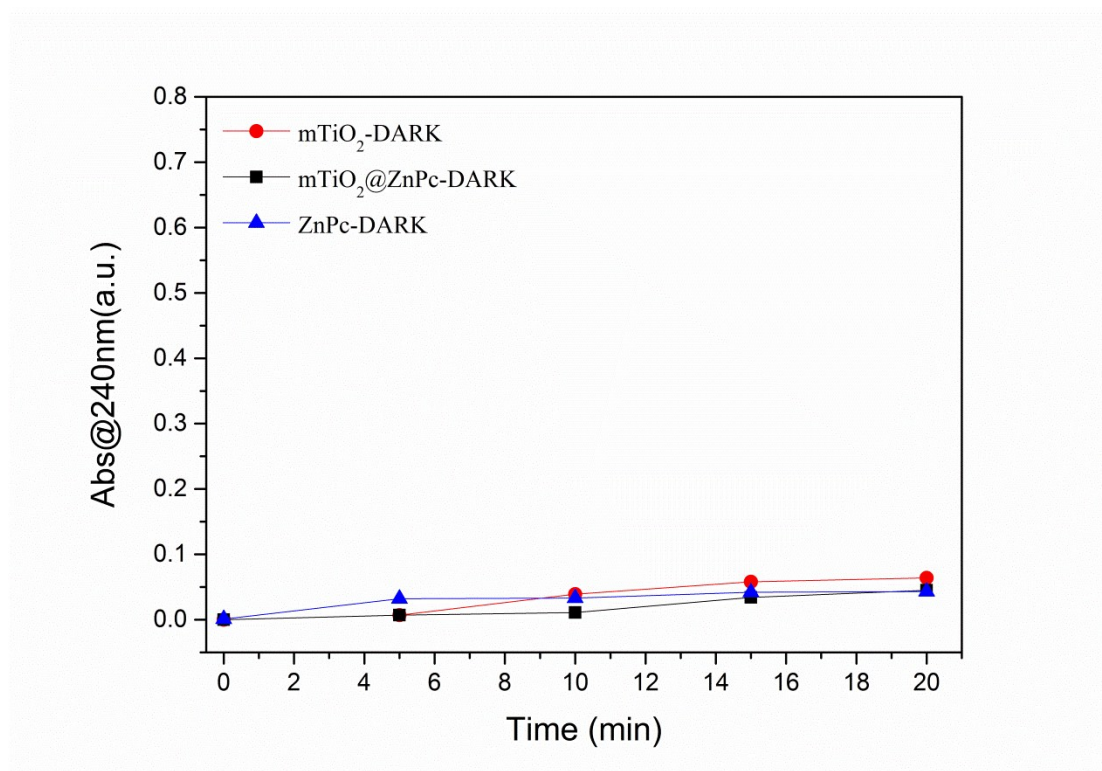

Fig. S9 Determination of DPBF degradation percentage under dark condition for 60 s.

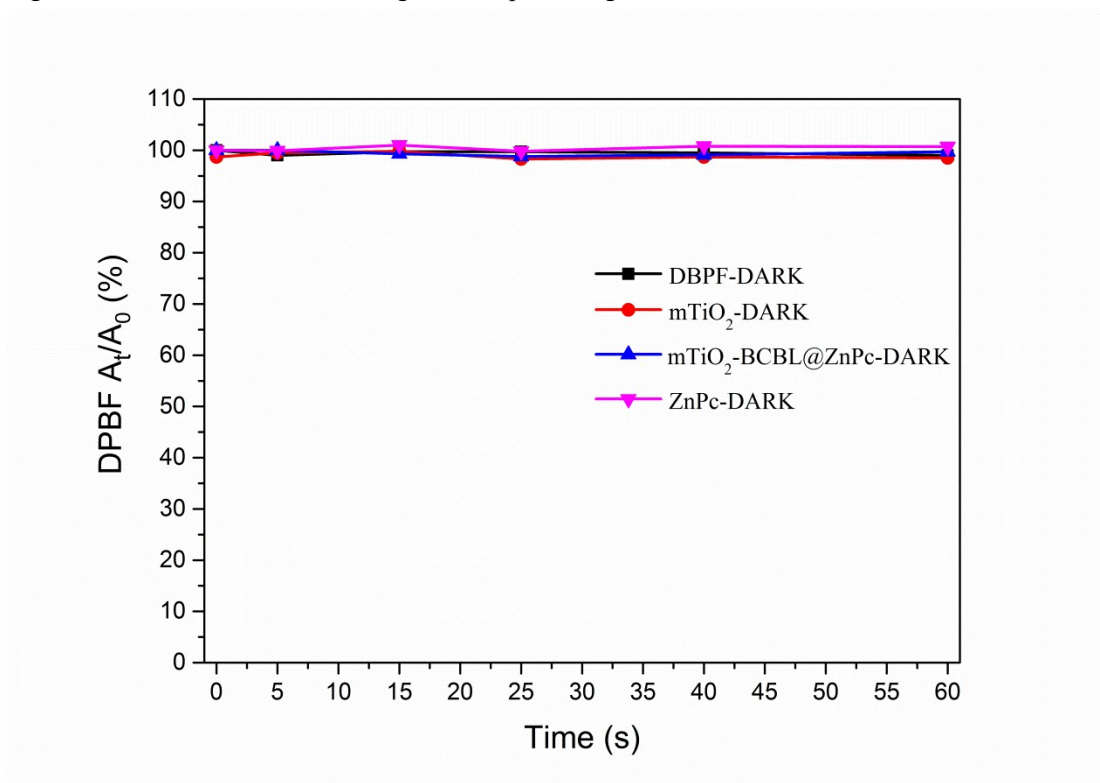

Fig. S10 Determination of MO degradation percentage under dark condition for 20 min.

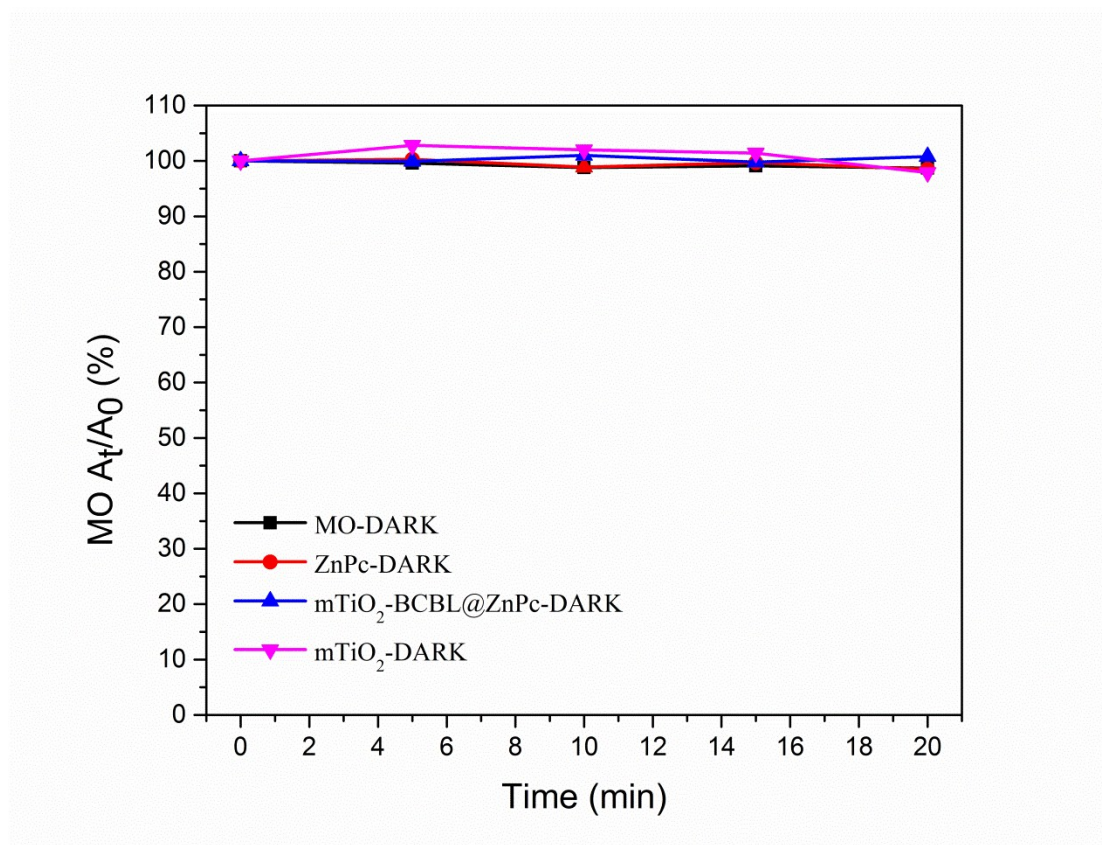

Fig. S11 The uptake of mTiO<sub>2</sub>-BCBL@ZnPc NPs characterized by CLSM in 8 h.

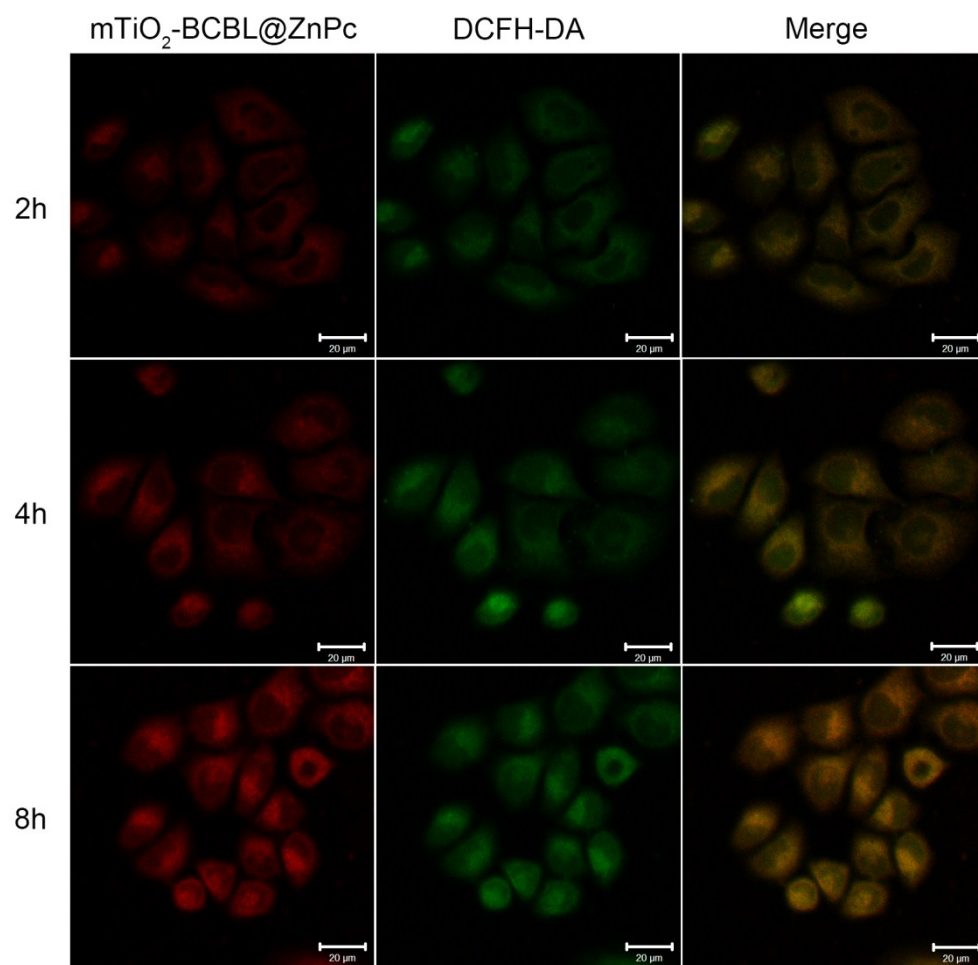

Fig. S12 Generation of ROS in MCF-7 cells treated with mTiO<sub>2</sub>-BCBL@ZnPc under different irradiation time were qualitative analysis by CLSM FCM

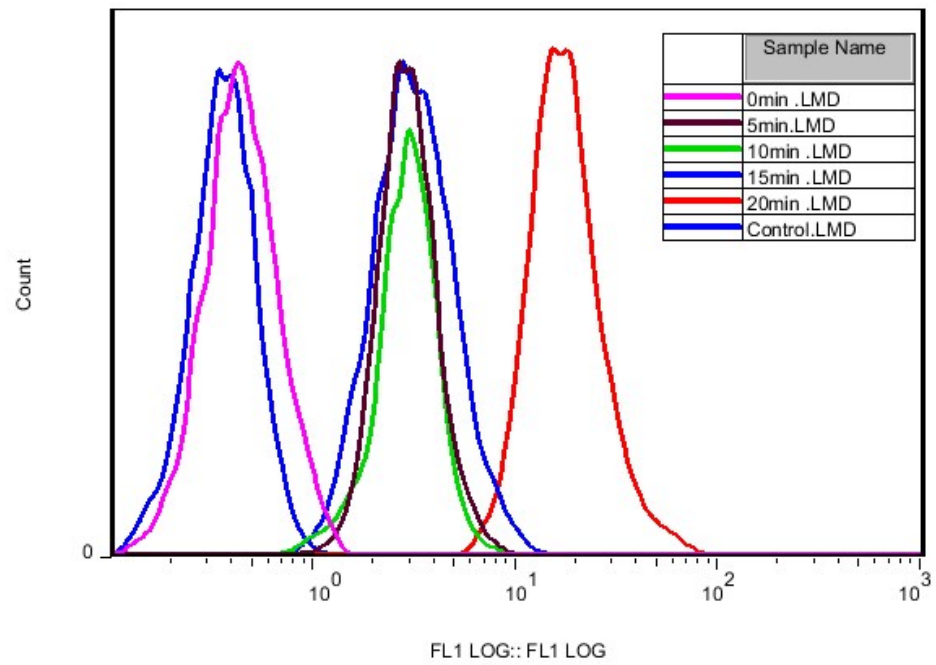

Fig. S13 The cytotoxicity of mTiO<sub>2</sub>-BCBL@ZnPc NPs in dark condition.

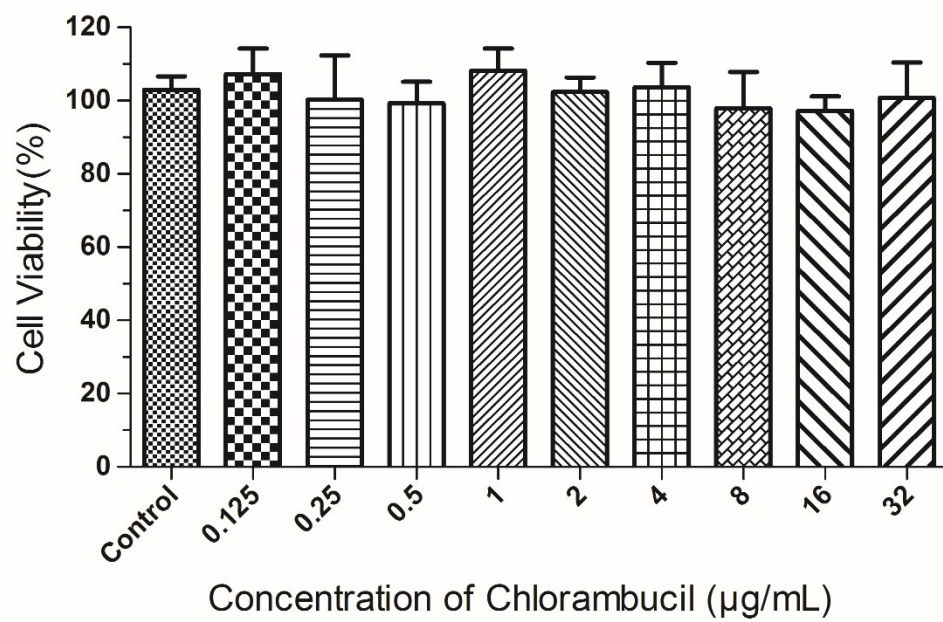

Fig.S14 The effect on Sprague–Dawley rats' RBCs with Different concentration of mTiO<sub>2</sub>-BCBL@ZnPc NPs.

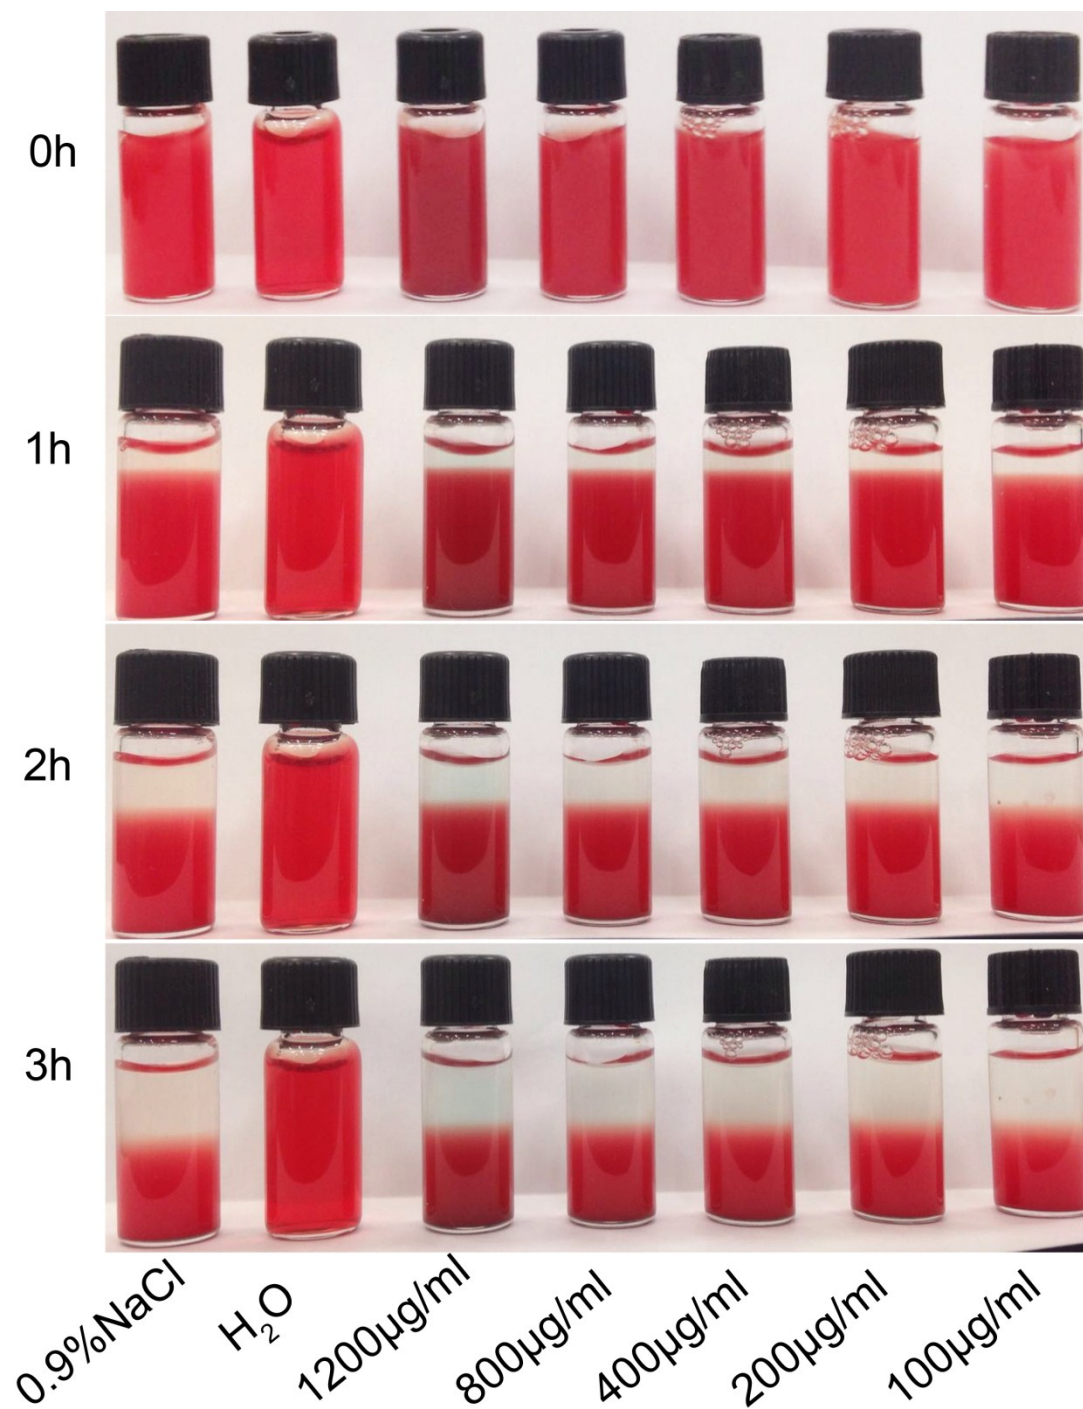

Supplement: c8tb00308d1.pdf [file c8tb00308d1.pdf]
